# Supplementary material for: Hardware-in-Loop Comparison of Physiological Closed-Loop Controllers for the Autonomous Management of Hypotension
Source: MDPI journal article supplement (doi:10.3390/bioengineering9090420), 2022-08-27
Supplement: s1 [file s1]

## Supplementary Information

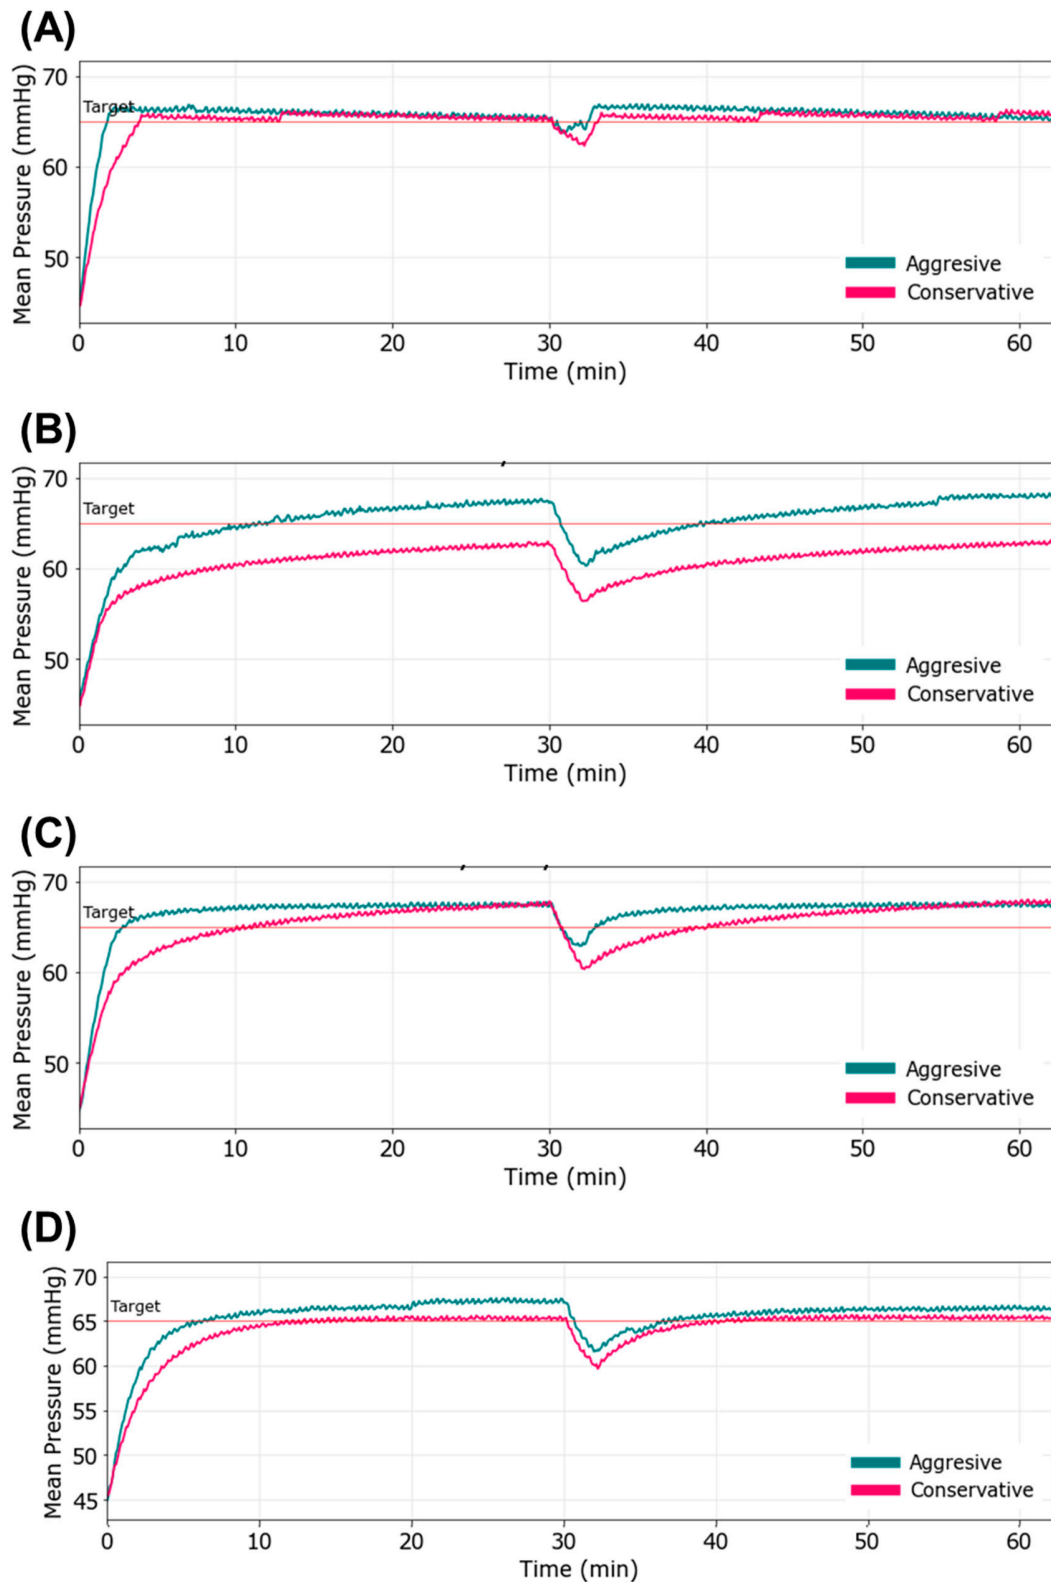

**Figure S1. Performance for all Controller Types and Configuration for Scenario 2.** Representative MAP vs. time for a single run of the aggressive and conservative (A) Decision Table, (B) Single-input Fuzzy Logic, (C) Dual-input Fuzzy Logic, and (D) PID (proportional-integral-derivative) controllers through Scenario 1. In Scenario 1, MAP began at 45 mmHg with no active hemorrhage until the 30-minute timepoint when a severe hemorrhage occurred for 2 minutes, followed by a return to no hemorrhage.

**Table S1. Compilation of metrics for all controller types and configurations for Scenario 1.** Types (DT = Decision Table; SFL = Single-input Fuzzy Logic; DFL = Dual-input Fuzzy Logic; PID = proportional-integral-derivative controller) and configurations (Agg = Aggressive; Con = Conservative) vs individual performance metrics. Each individual metric is an average of the normalized values for the three subject variabilities.

|                                | DT:Agg | DT:Con | SFL:Agg | SFL:Con | DFL:Agg | DFL:Con | PID:Agg | PID:Con |
|--------------------------------|--------|--------|---------|---------|---------|---------|---------|---------|
| MDPE (%)                       | 1.26   | 0.76   | 1.63    | -5.69   | 3.33    | 1.61    | 1.83    | 0.16    |
| MDAPE (%)                      | 1.32   | 0.89   | 2.74    | 5.69    | 3.37    | 2.73    | 2.04    | 0.58    |
| MDAPE_SS (%)                   | 1.30   | 0.86   | 2.66    | 4.96    | 3.35    | 2.64    | 1.99    | 0.53    |
| Target Overshoot (%)           | 2.78   | 2.02   | 4.85    | 0.00    | 4.33    | 4.62    | 3.50    | 1.07    |
| Effectiveness (%)              | 98.17  | 96.47  | 94.73   | 72.43   | 97.32   | 94.68   | 96.20   | 92.85   |
| Wobble (%)                     | 0.52   | 0.32   | 1.16    | 0.96    | 0.31    | 1.09    | 0.56    | 0.35    |
| End-State Divergence (%)       | 0.79   | 0.57   | 0.56    | 0.67    | 0.06    | 0.67    | 0.05    | 0.04    |
| Percent Rise Time (%)          | 1.81   | 3.20   | 4.07    | 7.87    | 2.55    | 4.03    | 3.38    | 5.51    |
| Volume Efficiency              | 2.91   | 3.03   | 3.18    | 2.97    | 3.13    | 3.18    | 3.11    | 3.05    |
| Area Above Target Pressure (%) | 1.28   | 0.78   | 1.77    | 0.00    | 3.04    | 1.76    | 1.63    | 0.29    |
| Area Below Target Pressure (%) | 0.46   | 0.90   | 1.72    | 7.07    | 0.69    | 1.71    | 1.11    | 1.97    |
| Mean Infusion (%)              | 3.50   | 3.56   | 3.77    | 3.17    | 3.76    | 3.77    | 3.69    | 3.50    |
| Variable Infusion (%)          | 71.91  | 55.58  | 19.83   | 24.12   | 39.66   | 20.87   | 87.12   | 32.10   |

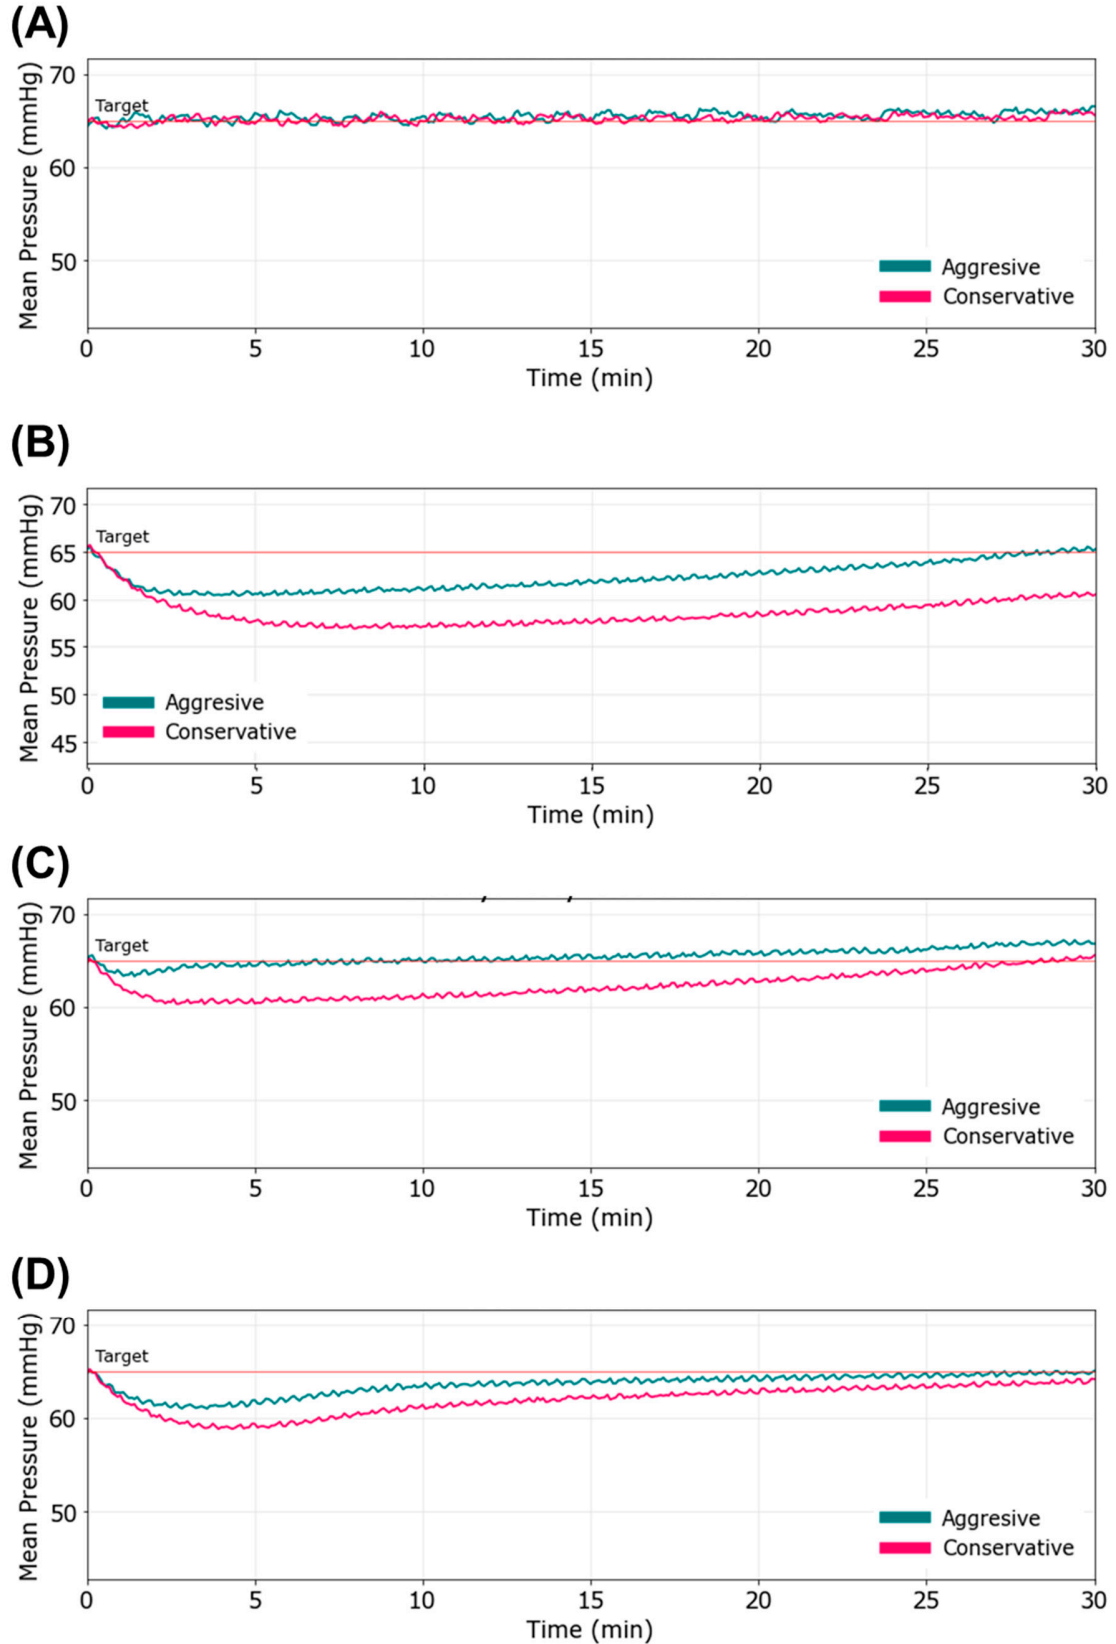

**Figure S2. Performance for all Controller Types and Configuration for Scenario 2.** Representative MAP vs. time for a single run of the aggressive and conservative (A) Decision Table, (B) Single-input Fuzzy Logic, (C) Dual-input Fuzzy Logic, and (D) PID (proportional-integral-derivative) controllers through Scenario 2. In Scenario 2, MAP begins at a stable 65 mmHg and presents a severe hemorrhage that clots over the 30-minute test scenario.

**Table S2. Compilation of metrics for all controller types and configurations for Scenario 2.** Types (DT = Decision Table; SFL = Single-input Fuzzy Logic; DFL = Dual-input Fuzzy Logic; PID = proportional-integral-derivative controller) and configurations (Agg = Aggressive; Con = Conservative) vs individual performance metrics. Each individual metric is an average of the normalized values for the three subject variabilities.

|                                | DT:Agg | DT:Con | SFL:Agg | SFL:Con | DFL:Agg | DFL:Con | PID:Agg | PID:Con |
|--------------------------------|--------|--------|---------|---------|---------|---------|---------|---------|
| MDPE (%)                       | 0.60   | 0.26   | -4.56   | -10.39  | 0.56    | -4.52   | -1.51   | -3.74   |
| MDAPE (%)                      | 0.68   | 0.45   | 4.56    | 10.39   | 0.93    | 4.52    | 1.57    | 3.74    |
| MDAPE_SS (%)                   | 0.68   | 0.45   | 3.66    | 10.62   | 0.93    | 3.61    | 1.57    | 3.82    |
| Target Overshoot (%)           | 2.31   | 1.72   | 0.81    | 0.82    | 3.41    | 0.93    | 1.28    | 0.53    |
| Effectiveness (%)              | 100.28 | 100.28 | 99.91   | 16.02   | 100.28  | 99.63   | 100.28  | 94.72   |
| Wobble (%)                     | 0.48   | 0.41   | 1.41    | 1.10    | 0.92    | 1.43    | 1.13    | 1.62    |
| End-State Divergence (%)       | 0.35   | 0.55   | 0.78    | 1.01    | 0.49    | 0.83    | 0.58    | 0.38    |
| Percent Rise Time (%)          | 0.00   | 0.00   | 0.00    | 0.37    | 0.00    | 0.00    | 0.00    | 0.00    |
| Volume Efficiency              | 1.03   | 1.01   | 99.13   | 76.57   | 1.04    | 0.98    | 100.17  | 95.53   |
| Area Above Target Pressure (%) | 0.68   | 0.40   | 0.03    | 0.00    | 0.88    | 0.03    | 0.13    | 0.01    |
| Area Below Target Pressure (%) | 0.08   | 0.17   | 4.14    | 9.75    | 0.27    | 4.11    | 1.75    | 3.81    |
| Mean Infusion (%)              | 6.67   | 6.48   | 5.78    | 4.13    | 6.64    | 5.72    | 7.10    | 6.52    |
| Variable Infusion (%)          | 167.19 | 117.36 | 8.17    | 9.78    | 17.71   | 8.95    | 74.72   | 11.52   |

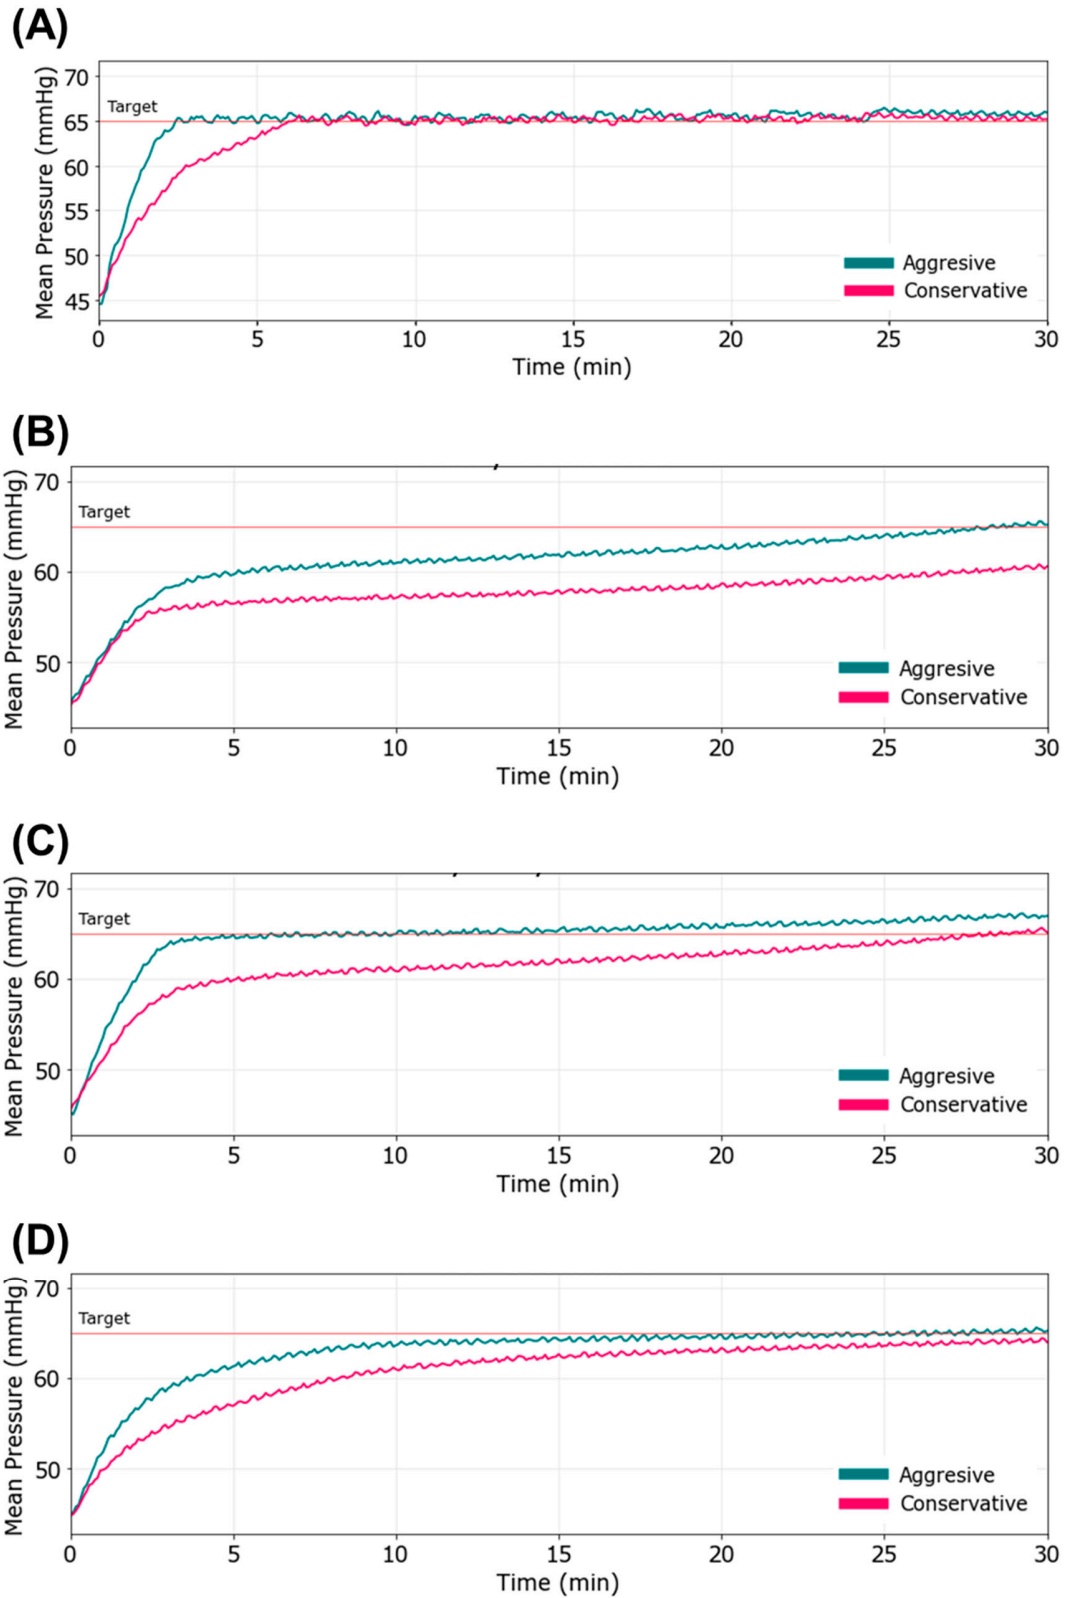

**Figure S3. Performance for all Controller Types and Configuration for Scenario 3.** Representative MAP vs. time for a single run of the aggressive and conservative (A) Decision Table, (B) Single-input Fuzzy Logic, (C) Dual-input Fuzzy Logic, and (D) PID (proportional-integral-derivative) controllers through Scenario 3. In Scenario 3, MAP began at 45 mmHg with an active hemorrhage that clotted over the 30-minute test run.

**Table S3. Compilation of metrics for all controller types and configurations for Scenario 3.** Types (DT = Decision Table; SFL = Single-input Fuzzy Logic; DFL = Dual-input Fuzzy Logic; PID = proportional-integral-derivative controller) and configurations (Agg = Aggressive; Con = Conservative) vs individual performance metrics. Each individual metric is an average of the normalized values for the three subject variabilities.

|                                | DT:Agg | DT:Con | SFL:Agg | SFL:Con | DFL:Agg | DFL:Con | PID:Agg | PID:Con |
|--------------------------------|--------|--------|---------|---------|---------|---------|---------|---------|
| MDPE (%)                       | 0.60   | 0.23   | -4.96   | -11.27  | 0.53    | -4.92   | -1.01   | -3.76   |
| MDAPE (%)                      | 0.74   | 0.59   | 4.96    | 11.27   | 1.07    | 4.92    | 1.38    | 3.76    |
| MDAPE_SS (%)                   | 0.70   | 0.46   | 2.36    | 9.53    | 0.89    | 2.26    | 1.00    | 2.11    |
| Target Overshoot (%)           | 2.27   | 1.63   | 0.92    | 0.00    | 3.41    | 0.81    | 1.97    | 0.54    |
| Effectiveness (%)              | 95.09  | 89.81  | 81.67   | 7.22    | 93.15   | 81.48   | 88.89   | 75.65   |
| Wobble (%)                     | 0.44   | 0.36   | 1.16    | 1.09    | 0.89    | 1.23    | 0.88    | 1.13    |
| End-State Divergence (%)       | 0.68   | 0.25   | 0.90    | 1.12    | 0.49    | 0.87    | 0.53    | 0.35    |
| Percent Rise Time (%)          | 4.44   | 8.24   | 11.57   | 63.89   | 6.20    | 11.11   | 8.80    | 17.22   |
| Volume Efficiency              | 1.84   | 1.83   | 1.89    | 1.73    | 1.85    | 1.89    | 1.79    | 1.80    |
| Area Above Target Pressure (%) | 0.67   | 0.36   | 0.02    | 0.00    | 0.90    | 0.03    | 0.25    | 0.02    |
| Area Below Target Pressure (%) | 1.14   | 2.23   | 5.93    | 11.68   | 1.58    | 5.91    | 3.05    | 6.00    |
| Mean Infusion (%)              | 11.01  | 10.36  | 9.84    | 8.16    | 10.80   | 9.81    | 11.40   | 10.48   |
| Variable Infusion (%)          | 105.86 | 69.53  | 11.97   | 14.85   | 19.85   | 12.33   | 58.09   | 13.25   |

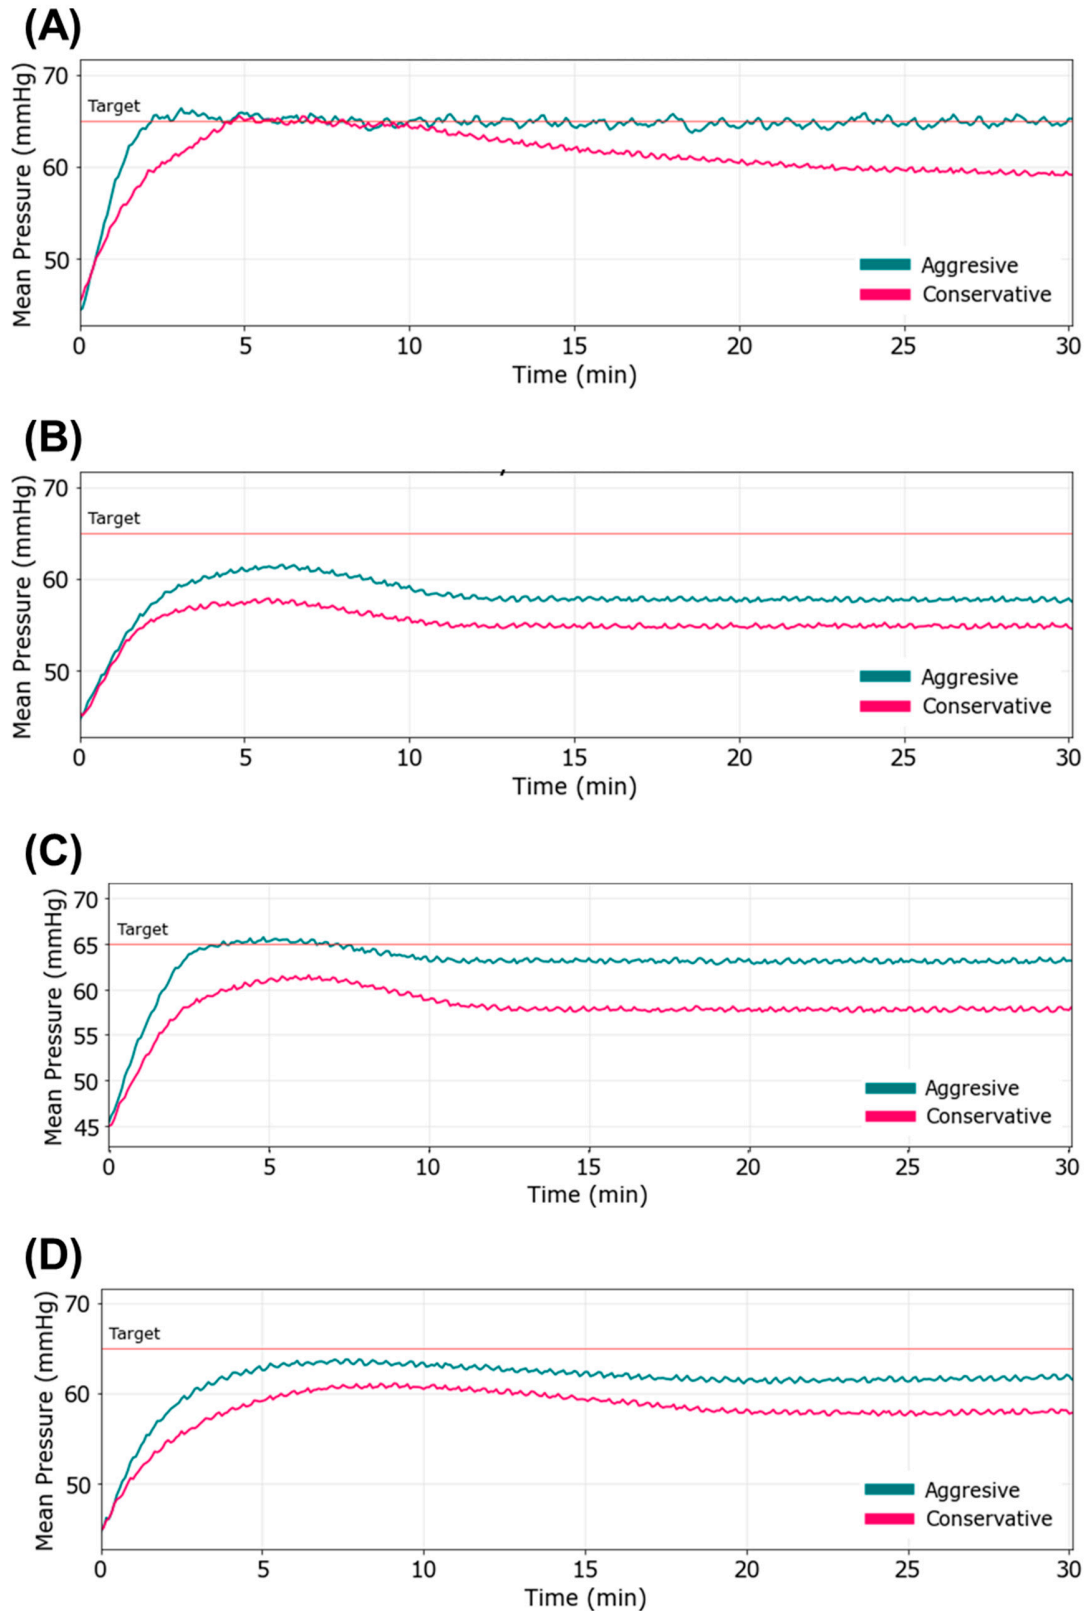

**Figure S4. Performance for all Controller Types and Configuration for Scenario 4.** Representative MAP vs. time for a single run of the aggressive and conservative (A) Decision Table, (B) Single-input Fuzzy Logic, (C) Dual-input Fuzzy Logic, and (D) PID (proportional-integral-derivative) controllers through Scenario 4. In Scenario 4, MAP began at 45 mmHg with an active hemorrhage that initially clotted until the 5-minute timepoint where clotting mechanisms were halted and hemorrhage rates increased.

**Table S4. Compilation of metrics for all controller types and configurations for Scenario 4.** Types (DT = Decision Table; SFL = Single-input Fuzzy Logic; DFL = Dual-input Fuzzy Logic; PID = proportional-integral-derivative controller) and configurations (Agg = Aggressive; Con = Conservative) vs individual performance metrics. Each individual metric is an average of the normalized values for the three subject variabilities.

|                                | DT:Agg | DT:Con | SFL:Agg | SFL:Con | DFL:Agg | DFL:Con | PID:Agg | PID:Con |
|--------------------------------|--------|--------|---------|---------|---------|---------|---------|---------|
| MDPE (%)                       | -0.29  | -6.00  | -11.02  | -15.55  | -2.87   | -10.97  | -5.16   | -10.75  |
| MDAPE (%)                      | 0.56   | 6.00   | 11.02   | 15.55   | 2.87    | 10.97   | 5.16    | 10.75   |
| MDAPE_SS (%)                   | 0.52   | 6.70   | 10.93   | 15.46   | 2.80    | 10.87   | 5.04    | 10.51   |
| Target Overshoot (%)           | 1.66   | 1.04   | 0.00    | 0.00    | 1.00    | 0.00    | 0.00    | 0.00    |
| Effectiveness (%)              | 95.66  | 71.65  | 15.14   | 0.00    | 94.00   | 14.96   | 90.95   | 14.22   |
| Wobble (%)                     | 0.49   | 1.30   | 0.37    | 0.36    | 0.34    | 0.38    | 0.53    | 0.70    |
| End-State Divergence (%)       | 0.11   | 0.47   | 0.25    | 0.07    | 0.11    | 0.07    | 0.30    | 0.17    |
| Percent Rise Time (%)          | 4.07   | 7.32   | 9.17    | 0.00    | 5.65    | 9.91    | 7.69    | 12.04   |
| Volume Efficiency              | 1.23   | 1.17   | 1.17    | 1.15    | 1.20    | 1.17    | 1.20    | 1.17    |
| Area Above Target Pressure (%) | 0.18   | 0.02   | 0.00    | 0.00    | 0.04    | 0.00    | 0.00    | 0.00    |
| Area Below Target Pressure (%) | 1.39   | 5.99   | 10.93   | 15.41   | 3.48    | 10.91   | 5.90    | 10.95   |
| Mean Infusion (%)              | 24.34  | 21.11  | 18.88   | 16.58   | 22.65   | 18.81   | 21.19   | 18.48   |
| Variable Infusion (%)          | 60.85  | 12.94  | 8.69    | 11.20   | 12.95   | 8.79    | 33.12   | 7.54    |

**Table S5. Compilation of metrics for all controller types and configurations for averaged across all scenarios.** Types (DT = Decision Table; SFL = Single-input Fuzzy Logic; DFL = Dual-input Fuzzy Logic; PID = proportional-integral-derivative controller) and configurations (Agg = Aggressive; Con = Conservative) vs individual performance metrics. Each individual metric is an average of the normalized values for the three subject variabilities across all four scenarios.

|                                | DT:Agg | DT:Con | SFL:Agg | SFL:Con | DFL:Agg | DFL:Con | PID:Agg | PID:Con |
|--------------------------------|--------|--------|---------|---------|---------|---------|---------|---------|
| MDPE (%)                       | 0.54   | -1.19  | -4.73   | -10.72  | 0.39    | -4.70   | -1.46   | -4.52   |
| MDAPE (%)                      | 0.83   | 1.98   | 5.82    | 10.72   | 2.06    | 5.78    | 2.54    | 4.71    |
| MDAPE_SS (%)                   | 0.80   | 2.12   | 4.90    | 10.14   | 1.99    | 4.84    | 2.40    | 4.24    |
| Target Overshoot (%)           | 2.26   | 1.6    | 1.64    | 0.2     | 3.04    | 1.59    | 1.69    | 0.53    |
| Effectiveness (%)              | 97.30  | 85.22  | 72.86   | 23.92   | 96.19   | 72.69   | 94.08   | 69.36   |
| Wobble (%)                     | 0.48   | 0.60   | 1.02    | 0.88    | 0.61    | 1.03    | 0.78    | 0.95    |
| End-State Divergence (%)       | 0.48   | 0.46   | 0.62    | 0.72    | 0.29    | 0.61    | 0.36    | 0.23    |
| Percent Rise Time (%)          | 3.44   | 6.25   | 8.27    | 24.04   | 4.80    | 8.35    | 6.62    | 11.59   |
| Volume Efficiency              | 1.75   | 1.75   | 1.81    | 1.65    | 1.80    | 1.80    | 1.78    | 1.74    |
| Area Above Target Pressure (%) | 0.70   | 0.39   | 0.45    | 0.00    | 1.22    | 0.45    | 0.50    | 0.08    |
| Area Below Target Pressure (%) | 0.77   | 2.32   | 5.68    | 10.98   | 1.51    | 5.66    | 2.95    | 5.68    |
| Mean Infusion (%)              | 11.38  | 10.38  | 9.57    | 8.01    | 10.96   | 9.53    | 10.85   | 9.74    |
| Variable Infusion (%)          | 101.45 | 63.85  | 12.16   | 14.99   | 22.54   | 12.74   | 63.26   | 16.10   |
